# Supplementary material for: Is Walk Score associated with hospital admissions from chronic diseases? Evidence from a cross-sectional study in a high socioeconomic status Australian city-state
Source: PubMed Central journal article supplement — BMJ Open. 2016 Dec 8;6(12):e012548. doi: 10.1136/bmjopen-2016-012548 (PMC5168632; doi:10.1136/bmjopen-2016-012548), 2016-12-08
Supplement: bmjopen-2016-012548supp_appendix.pdf [file bmjopen-2016-012548supp_appendix.pdf]

**Table S1.1:** Summary of key individual level covariates in hospitalization data

|                                                    |          |
|----------------------------------------------------|----------|
| <b>Percent Female</b>                              | 53.55    |
| <b>Percent Married or in De Facto Relationship</b> | 48.74    |
| <b>Percent with Private insurance</b>              | 87.96    |
| <b>Percent with hospital insurance</b>             | 72.17    |
| <b>Median age</b>                                  | 63 years |
